# Supplementary material for: The impact of onabotulinumtoxinA on severe headache days: PREEMPT 56-week pooled analysis
Source: PubMed Central journal article supplement (PMC5539058; doi:10.1186/s10194-017-0784-4), 2017-08-01

**Supplementary Table. Percentage of patients with a measurable change in headache severity among patients with <30% reduction in headache-day frequency.**

| <i>Patients with severity response (≥1-grade improvement from baseline in severity based on patient diary)</i> |                                                                  |                                                   |                       |
|----------------------------------------------------------------------------------------------------------------|------------------------------------------------------------------|---------------------------------------------------|-----------------------|
|                                                                                                                | <b>OnabotulinumtoxinA<br/>/<br/>OnabotulinumtoxinA<br/>n=194</b> | <b>Placebo /<br/>OnabotulinumtoxinA<br/>n=261</b> | <b><i>P</i>-value</b> |
| <b>Week 24</b>                                                                                                 | 24.2%                                                            | 13.8%                                             | 0.004                 |
| <b>Week 56</b>                                                                                                 | 54.1%                                                            | 57.9%                                             | 0.428                 |

**Supplementary Figure 1. Change from baseline in the number of severe headache days per 28-day period, among patients with <30% reduction in headache-day frequency.**

\* $P < 0.001$ , † $P < 0.05$ .

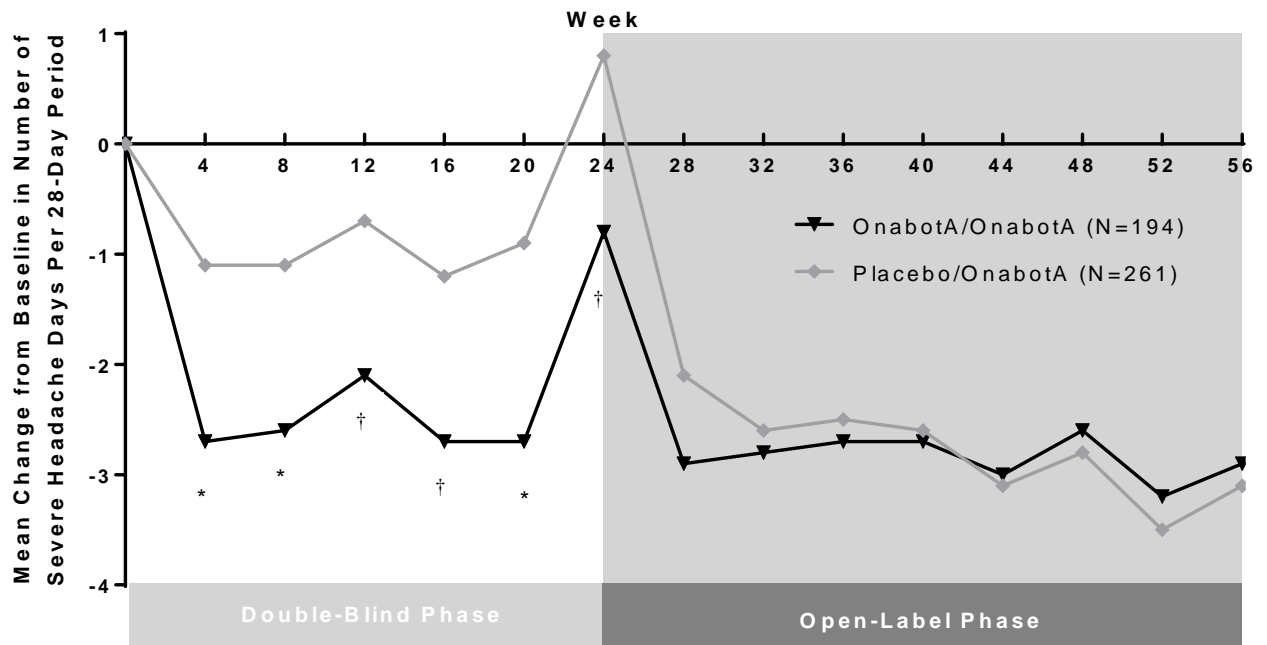

**Supplementary Figure 2. Percentage of severe headache days, pooled across patients with <30% reduction in headache-day frequency.**

\* $P < 0.001$ , † $P < 0.05$ .

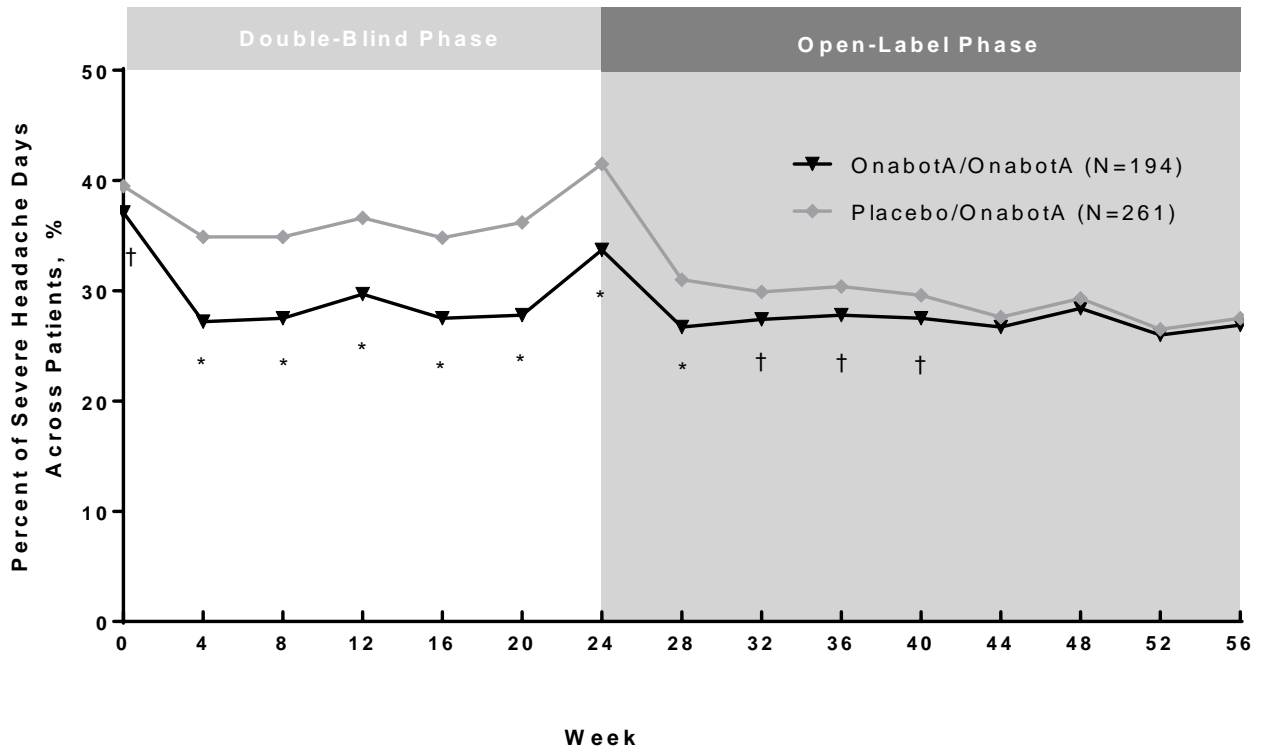

Supplement: 10194_2017_784_MOESM1_ESM.pdf [file 10194_2017_784_MOESM1_ESM.pdf]
